# Supplementary material for: The Effectiveness of Web-Based Asthma Self-Management System, My Asthma Portal (MAP): A Pilot Randomized Controlled Trial
Source: PubMed Central journal article supplement (PMC5159614; doi:10.2196/jmir.5866), 2016-12-01
Supplement: jmir_v18i12e313_app1.pdf [file jmir_v18i12e313_app1.pdf]

| Outcome Monitored                                 | Green                       | Yellow                          | Red                                   |
|---------------------------------------------------|-----------------------------|---------------------------------|---------------------------------------|
| Symptoms                                          | No symptoms                 | 1 symptom                       | 2 symptoms or emergency visit or both |
| Overuse of rescue puffer <sup>a</sup>             | $P < 150$                   | $250 > P \geq 150$              | $P \geq 250$                          |
| Adherence to preventative medication <sup>b</sup> | $n/d \geq 90\%$             | $90\% > n/d > 70\%$             | $n/d \leq 70\%$                       |
| Exercise <sup>c</sup>                             | number steps $\geq$ average | number steps $>$ 2/3 of average | number steps $<$ 2/3 of average       |
| Action Plan Understanding%                        | "Yes" to all questions      | N/A                             | "No" to at least one question         |

<sup>a</sup>( $P$  = number of puffs corresponding to all FABA and combivent dispensed over the past 3 months).

<sup>b</sup>(quantity dispensed/3 months) [144].

<sup>c</sup>Calculated once exercise monitoring questionnaire is completed 4 or more times (average is the mean value for the first three entries,  $x$  = the last steps entry).

%Action Plan questions: Do you understand what to do in your action plan? Are you able to describe the signs or symptoms you have when your asthma is getting worse?
