# Supplementary material for: The Effectiveness of Web-Based Asthma Self-Management System, My Asthma Portal (MAP): A Pilot Randomized Controlled Trial
Source: PubMed Central journal article supplement (PMC5159614; doi:10.2196/jmir.5866), 2016-12-01
Supplement: jmir_v18i12e313_app2.pdf [file jmir_v18i12e313_app2.pdf]

| Evaluation Time | Poor control status |                 |         |     |                                          |           | MAQLQ        |           |         |           |                                          |               |
|-----------------|---------------------|-----------------|---------|-----|------------------------------------------|-----------|--------------|-----------|---------|-----------|------------------------------------------|---------------|
|                 | Intervention        |                 | Control |     | Change between time periods <sup>b</sup> |           | Intervention |           | Control |           | Change between time periods <sup>b</sup> |               |
|                 | n (%)               | SD <sup>a</sup> | n (%)   | SD  | OR <sup>c</sup>                          | 95% CI    | n            | Mean (SD) | n       | Mean (SD) | MC <sup>d</sup>                          | 95% CI        |
| <b>Observed</b> |                     |                 |         |     |                                          |           |              |           |         |           |                                          |               |
| <b>Baseline</b> | 45 (15)             |                 | 45 (18) |     | 0.74                                     | 0.25-2.19 | 47           | 4.8 (1.3) | 51      | 4.9 (1.3) | -0.10                                    | -0.58 to 0.39 |
| <b>3 months</b> | 45 (15)             |                 | 45 (16) |     | 0.67                                     | 0.18-2.52 | 31           | 5.6 (1.2) | 47      | 5.0 (1.3) | 0.47                                     | -0.05 to 0.99 |
| <b>6 months</b> | 45 (17)             |                 | 45 (16) |     | 0.62                                     | 0.16-2.33 | 28           | 5.6 (1.2) | 48      | 5.2 (1.2) | 0.31                                     | -0.21 to 0.84 |
| <b>9 months</b> | 45 (17)             |                 | 45 (16) |     | 0.69                                     | 0.18-2.73 | 28           | 5.5 (1.3) | 47      | 5.1 (1.2) | 0.15                                     | -0.38 to 0.67 |
| <b>Imputed</b>  |                     |                 |         |     |                                          |           |              |           |         |           |                                          |               |
| <b>Baseline</b> | 47 (16)             | 1.6             | 51 (23) | 2.1 | 0.67                                     | 0.23-1.94 | 47           | 4.8 (1.3) | 51      | 4.9 (1.3) | -0.10                                    | -0.62 to 0.42 |
| <b>3 months</b> | 47 (15)             | 0.9             | 51(19)  | 1.3 | 0.78                                     | 0.26-2.28 | 47           | 5.3 (1.4) | 51      | 5.0 (1.2) | 0.27                                     | -0.28 to 0.81 |
| <b>6 months</b> | 47 (18)             | 1.4             | 51 (19) | 1.9 | 0.94                                     | 0.33-2.71 | 47           | 5.3 (1.3) | 51      | 5.1 (1.2) | 0.22                                     | -0.34 to 0.78 |
| <b>9 months</b> | 47 (19)             | 1.4             | 51 (18) | 2.2 | 1.09                                     | 0.37-3.22 | 47           | 5.0 (1.5) | 51      | 5.1 (1.2) | -0.08                                    | -0.63 to 0.46 |

<sup>a</sup>There is an SD on the proportion of patients with poor control status only for imputed data.

<sup>b</sup>Changes reported between intervention and control groups are for models adjusted for intervention group and time only

<sup>c</sup>OR, odds ratio.

<sup>d</sup>MC, mean change.
